# Supplementary material for: Enhancing Implicit Mentalizing in Autism Spectrum Disorder with Theta-burst stimulation of the Right Temporoparietal Junction: A Randomized Sham-controlled Double-blind Crossover Study
Source: Research Square preprint supplement (doi:10.21203/rs.3.rs-2995235/v1), 2023-07-13
Supplement: Supplementary file 1 [file 04b8f5d5cff0410c1be2917c.pdf]

### **Electrical field modeling**

In order to calculate the electric field induced by transcranial magnetic stimulation (TMS), we utilized the SimNIBS 4 package [1]. The head model employed in this simulation was based on the NIHPD atlas [2, 3], which consists of average brain volumes from 324 children aged 4.5 to 18.5 years. The maximal rate of change of current ( $dI/dt$ ) at 100% maximum stimulator output (MSO) of the MagVenture MC-B70 Butterfly coil was calculated to be 155.3 A/ $\mu$ s [4]. During our simulations, we set the primary field caused by the coil to be 80% of the AMT (averaged among participants), which we determined to be 55.22 A/ $\mu$ s.

[1] Thielscher, A., Antunes, A. and Saturnino, G.B. (2015), Field modeling for transcranial magnetic stimulation: a useful tool to understand the physiological effects of TMS? IEEE EMBS 2015, Milano, Italy

[2] VS Fonov, AC Evans, K Botteron, CR Almli, RC McKinstry, DL Collins and BDCG, Unbiased average age-appropriate atlases for pediatric studies, NeuroImage, In Press, ISSN 1053–8119, DOI: 10.1016/j.neuroimage.2010.07.033

[3] VS Fonov, AC Evans, RC McKinstry, CR Almli and DL Collins Unbiased nonlinear average age-appropriate brain templates from birth to adulthood NeuroImage, Volume 47, Supplement 1, July 2009, Page S102 Organization for Human Brain Mapping 2009 Annual Meeting, DOI: 10.1016/S1053-8119(09)70884-5

[4] Drakaki M, Mathiesen C, Siebner HR, Madsen KH, Thielscher A. (2022). Database of 25 validated coil models for electric field simulations for TMS. Brain Stimulation.
