# Supplementary material for: Enhancing Implicit Mentalizing in Autism Spectrum Disorder with Theta-burst stimulation of the Right Temporoparietal Junction: A Randomized Sham-controlled Double-blind Crossover Study
Source: Research Square preprint supplement (doi:10.21203/rs.3.rs-2995235/v1), 2023-07-13
Supplement: Supplementary file 2 [file d6cba7d77686a1b1995303f8.pdf]

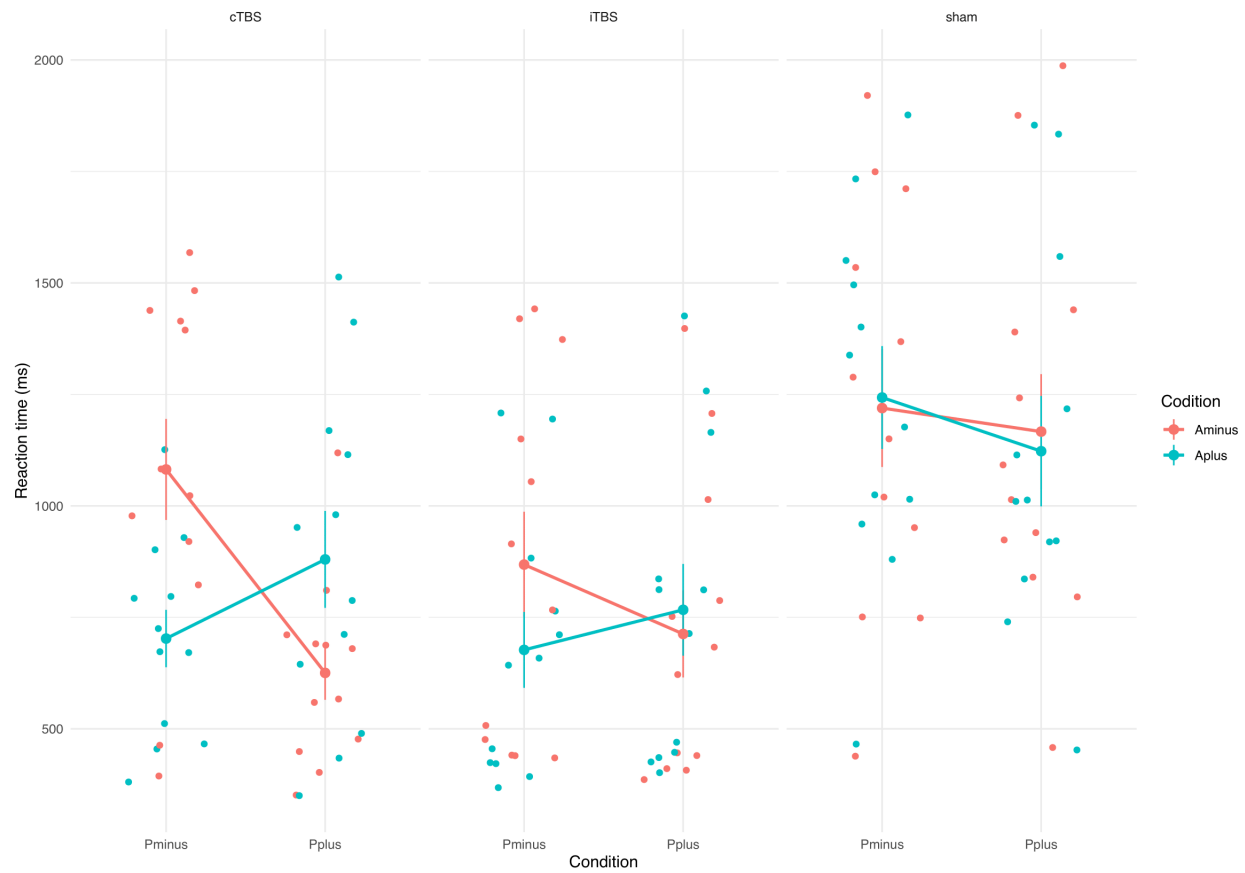

**Fig sup1. The Effect of TBS on Own/Other's Belief Interaction.** During active stimulation sessions (cTBS and iTBS), when there was a disagreement between the participant's and the agent's beliefs, their reaction time was quicker compared to when they shared similar beliefs. In other words, conflicting beliefs between the participant and agent resulted in a faster reaction time, with a greater effect size observed during cTBS.
